# Supplementary material for: Genomics of lipid-laden human hepatocyte cultures enables drug target screening for the treatment of non-alcoholic fatty liver disease
Source: PubMed Central journal article supplement (PMC6295111; doi:10.1186/s12920-018-0438-7), 2018-12-14
Supplement: 12920_2018_438_MOESM1_ESM.pdf [file 12920_2018_438_MOESM1_ESM.pdf]

**Supplementary Table S1: Patient characteristics of hepatocyte donors.**

| <b>patient ID</b> | <b>gender</b> | <b>age</b> | <b>reason for liver surgery</b>                  | <b>medical history</b>                                                           |
|-------------------|---------------|------------|--------------------------------------------------|----------------------------------------------------------------------------------|
| <i>donor 1</i>    | female        | 61-65      | <i>colorectal cancer metastatic to the liver</i> | <i>BMI 27, non-smoking; no prior history of liver disease</i>                    |
| <i>donor 2</i>    | female        | 50-55      | <i>colorectal cancer metastatic to the liver</i> | <i>BMI 24, smoking cessation 10 years ago; no prior history of liver disease</i> |
| <i>donor 3</i>    | female        | 56-60      | <i>colorectal cancer metastatic to the liver</i> | <i>BMI 23, non-smoking; no prior history of liver disease</i>                    |
| <i>donor 4</i>    | female        | 66-70      | <i>colorectal cancer metastatic to the liver</i> | <i>BMI 27, non-smoking no prior history of liver disease</i>                     |
| <i>donor 5</i>    | female        | 61-65      | <i>colorectal cancer metastatic to the liver</i> | <i>BMI 30, non-smoking; no prior history of liver disease</i>                    |
| <i>donor 6</i>    | male          | 71-75      | <i>colorectal cancer metastatic to the liver</i> | <i>BMI 28, non-smoking; no prior history of liver disease</i>                    |

None of the patients were clinically obese or required insulin therapy and had no prior history of liver disease. Except for one case the patients were never smokers. The age of the patients is given as a range to secure their anonymity.
