# Supplementary material for: Genomics of lipid-laden human hepatocyte cultures enables drug target screening for the treatment of non-alcoholic fatty liver disease
Source: PubMed Central journal article supplement (PMC6295111; doi:10.1186/s12920-018-0438-7), 2018-12-14
Supplement: 12920_2018_438_MOESM2_ESM.pdf [file 12920_2018_438_MOESM2_ESM.pdf]

### Supplementary Figure S1: Quantification of intracellular lipid content over time

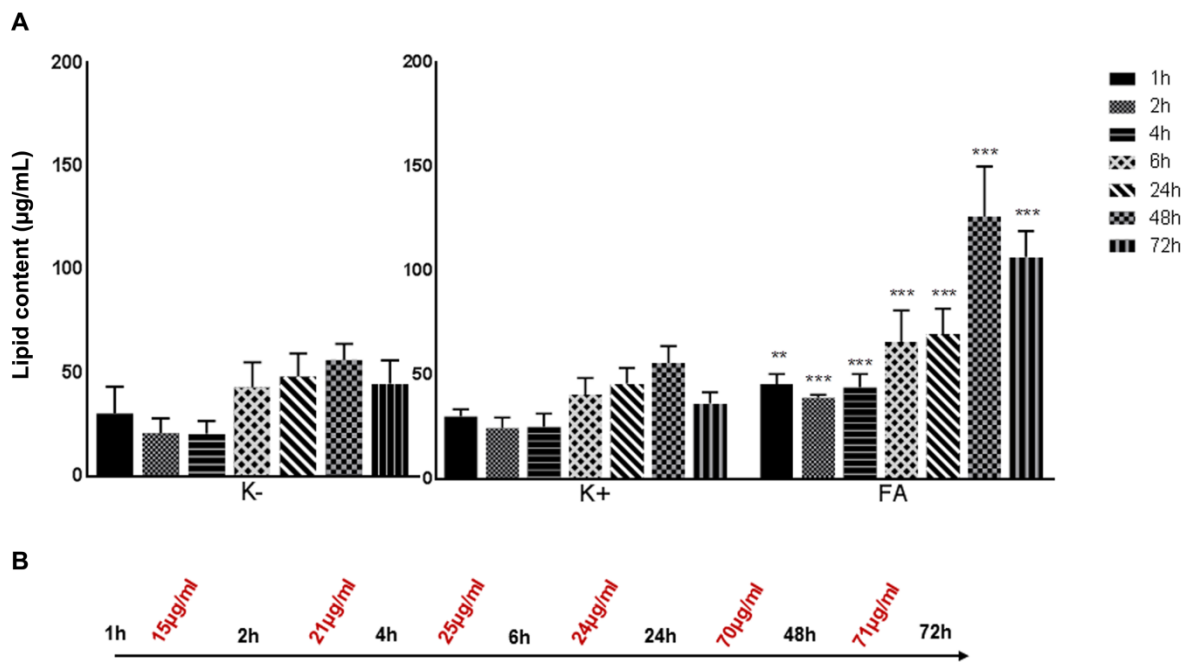

(A) The plotted graph depicts three treatment conditions, i.e. HepG2 cells without any treatment (K-) or after treatment with the DMSO vehicle control (K+) or after treatment with a 1:1 mixture of the fatty acids OA/PA for 1h, 2h, 4h, 6h, 24h, 48h and 72h. After 6h of treatment, the lipid content increased by 25µg/ml (K+, n=28; PA/OA, n=23); after 24h by 24µg/ml (K+, n=15; PA/OA, n=18), after 48h by 70µg/ml (K+, n=14; PA/OA, n=17) and after 72h by 71µg/ml (K+, n=7; PA/OA, n=14) when compared to the DMSO vehicle control (K+), respectively. (T-Test K+ ↔ PA/OA: 1h,  $p \leq 0,00$ ; 2h,  $p \leq 1,87 \times 10^{-6}$ ; 4h,  $p \leq 3,5 \times 10^{-7}$ ; 6h,  $p \leq 6,3 \times 10^{-10}$ ; 24h,  $p \leq 2,4 \times 10^{-7}$ ; 48h,  $p \leq 2,6 \times 10^{-11}$ ; 72h,  $p \leq 1,6 \times 10^{-11}$ ).

\* corresponds to a p-value of  $p \leq 0,001$ .

(B) The histogram visualizes the increase in intracellular lipid content over time as compared to the DMSO vehicle control.
